# Supplementary material for: Antioxidant and anti-inflammatory protective effects of yellowtail (Seriola quinqueradiata) milt hydrolysates on human intestinal epithelial cells in vitro and dextran sodium sulphate-induced mouse colitis in vivo
Source: Royal Society of Chemistry journal article supplement (doi:10.1039/d2fo00967f), 2022-01-01
Supplement: d2fo00967f1.pdf [file d2fo00967f1.pdf]

**Antioxidant and anti-inflammatory protective effects of yellowtail (*Seriola  
quinqueradiata*) milt hydrolysates on human intestinal epithelial cells in vitro  
and dextran sodium sulphate-induced mouse colitis in vivo**

Shiyang Li <sup>a</sup>, Ning Yuan <sup>b</sup>, Wei Guo <sup>c</sup>, Yuan Chai <sup>a</sup>, Yi Song <sup>a</sup>, Yuanhui Zhao <sup>a</sup>,  
Mingyong Zeng <sup>a</sup>, Haohao Wu <sup>a\*</sup>,

<sup>a</sup> *College of Food Science and Engineering, Ocean University of China, 5 Yushan  
Road, Qingdao, Shandong Province, 266003, China*

<sup>b</sup> *College of Science and Technology, Hebei Agricultural University, Cangzhou  
061100, China*

<sup>c</sup> *School of Pharmacy, Binzhou Medical University, 346 Guanhai Road, Yantai,  
Shandong, 264003, China*

\* The author to whom correspondence should be addressed; E-mail:

[wuhaohao@ouc.edu.cn](mailto:wuhaohao@ouc.edu.cn); Tel. & Fax: +86-532-8203-2400.

1 **Table S1** The criteria for DAI

| Score | Weight loss | Stool consistency | Rectal bleeding  |
|-------|-------------|-------------------|------------------|
| 0     | None        | Normal stools     | Negative         |
| 1     | 1-5%        | Soft stools       | Negative         |
| 2     | 6-10%       | Soft stools       | Positive         |
| 3     | 11-15%      | Very soft         | Visible in stool |
| 4     | > 15%       | Watery stool      | Gross bleeding   |

2  
3  
4

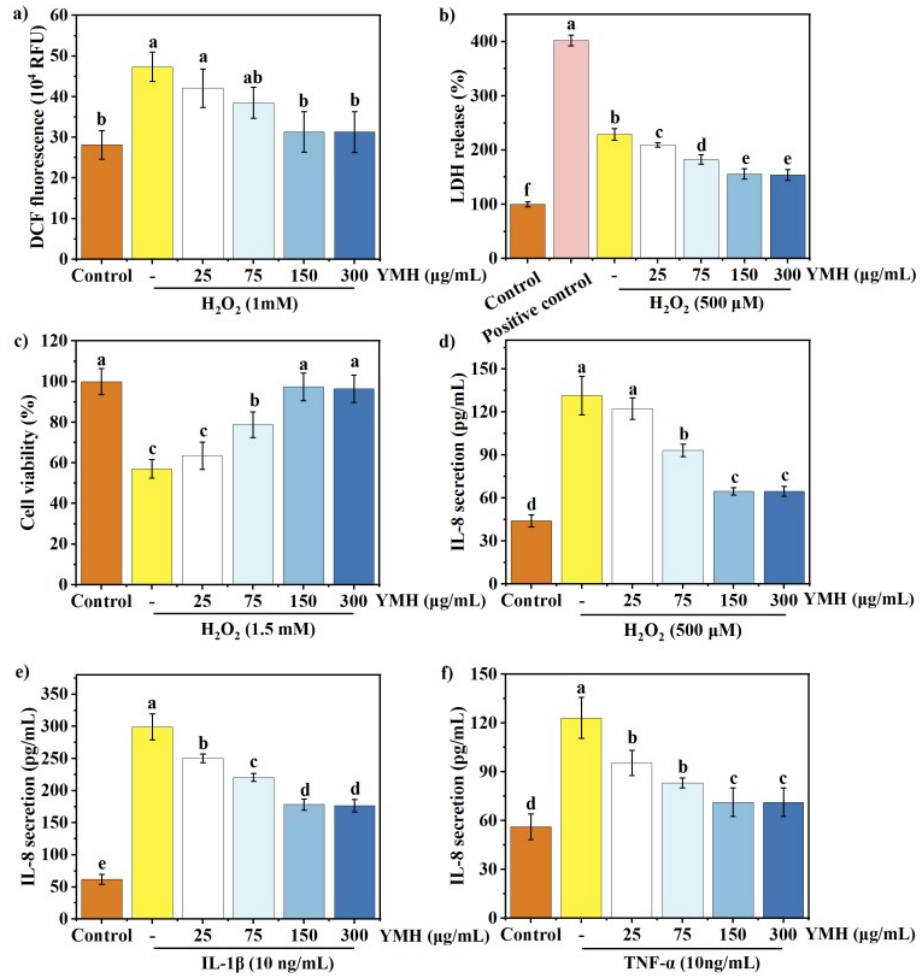

5 **Figure S1.** Beneficial effects of yellowtail milt hydrolysates (YMH) on Caco-2  
6 cells: (a) 2',7'-dichlorodihydrofluoresce in measurement of intracellular reactive  
7 oxygen species, (b) release of cytosolic lactate dehydrogenase (LDH), and (c) cell  
8 viability when stimulated with H<sub>2</sub>O<sub>2</sub>; (d) interleukin (IL)-8 production when  
9 stimulated with (d) H<sub>2</sub>O<sub>2</sub>, (e) IL-1β and (f) tumor necrosis factor (TNF)-α.  
10 Different superscript letters (a-d) denote statistically significant differences of data  
11 (n = 3) at *P* < 0.05.

12 .

13
